# Supplementary material for: Point-of-contact interactive record linkage (PIRL) between demographic surveillance and health facility data in rural Tanzania
Source: PubMed Central journal article supplement — Int J Popul Data Sci. 2017 Dec 15;2(1):408. doi: 10.23889/ijpds.v2i1.408 (PMC6314455; doi:10.23889/ijpds.v2i1.408), 2017-12-15
Supplement: NIHMS80104-supplement-Supplementary_Appendices.pdf [file NIHMS80104-supplement-Supplementary_Appendices.pdf]

## Supplementary Appendices

**Supplemental Table 1.** Agreement conditions, match ( $m$ ) probabilities, proportion collected, and proportion of records with agreement for each field ( $i$ ) in the probabilistic algorithm, by first and matched search attempts

**Supplemental Figure 1.** Log frequency of match scores calculated for all pairwise comparisons using full algorithm, by true match status

**Supplemental Figure 2.** Log frequency of match scores calculated for all pairwise comparisons using limited algorithm, by true match status

**Supplemental Figure 3.** Sensitivity ( $Se$ ) and positive predictive value (PPV) of automated retrospective record linkage at various match score percentile thresholds, full (F) vs. limited (L) algorithm

**Supplemental Table 2.** Distribution of individual characteristics in the dataset matched using point-of-contact interactive record linkage (PIRL) compared with those matched using a purely automated probabilistic approach using a full and limited algorithm, by match score threshold

Supplemental Table 1: Agreement conditions, match (m) probabilities, proportion collected, and proportion of records with agreement for each field (i) in the probabilistic algorithm, by first and matched search attempts,  $n_M=2,612$

| Field <i>i</i>  | Agreement condition     | m-prob | First search |             | Matched search |             | Change ( $\Delta$ )=matched-first |                      |
|-----------------|-------------------------|--------|--------------|-------------|----------------|-------------|-----------------------------------|----------------------|
|                 |                         |        | % collected  | % agreement | % collected    | % agreement | $\Delta$ % collected              | $\Delta$ % agreement |
| First name      | Jaro-Winkler $\geq 0.8$ | 0.87   | 100.0%       | 83.8%       | 100.0%         | 94.1%       | 0.0%                              | 10.3%                |
| Second name     | Jaro-Winkler $\geq 0.8$ | 0.87   | 100.0%       | 77.9%       | 100.0%         | 87.9%       | 0.0%                              | 10.1%                |
| Third name      | Jaro-Winkler $\geq 0.8$ | 0.85   | 83.4%        | 5.7%        | 82.0%          | 5.3%        | -1.4%                             | -0.3%                |
| TCL first name  | Jaro-Winkler $\geq 0.8$ | 0.87   | 44.8%        | 15.1%       | 65.8%          | 42.9%       | 20.9%                             | 27.8%                |
| TCL second name | Jaro-Winkler $\geq 0.8$ | 0.87   | 39.4%        | 13.6%       | 60.8%          | 40.9%       | 21.5%                             | 27.3%                |
| TCL third name  | Jaro-Winkler $\geq 0.8$ | 0.85   | 0.2%         | 0.0%        | 0.2%           | 0.2%        | 0.0%                              | 0.1%                 |
| HH first name   | Jaro-Winkler $\geq 0.8$ | 0.52   | 90.5%        | 70.1%       | 93.2%          | 75.2%       | 2.7%                              | 5.1%                 |
| HH second name  | Jaro-Winkler $\geq 0.8$ | 0.52   | 89.6%        | 64.3%       | 92.2%          | 70.8%       | 2.6%                              | 6.5%                 |
| HH third name   | Jaro-Winkler $\geq 0.8$ | 0.52   | 4.1%         | 1.1%        | 4.4%           | 1.1%        | 0.3%                              | 0.0%                 |
| Sex             | exact match             | 0.99   | 99.8%        | 97.6%       | 99.8%          | 97.7%       | 0.0%                              | 0.1%                 |
| Year of birth   | within 2 years          | 0.80   | 98.7%        | 84.9%       | 99.1%          | 87.0%       | 0.4%                              | 2.1%                 |
| Month of birth  | exact match             | 0.63   | 3.7%         | 1.4%        | 4.0%           | 1.6%        | 0.3%                              | 0.2%                 |
| Day of birth    | exact match             | 0.57   | 3.6%         | 1.0%        | 3.9%           | 1.2%        | 0.3%                              | 0.2%                 |
| Village         | exact match             | 0.89   | 90.9%        | 83.3%       | 93.0%          | 89.4%       | 2.1%                              | 6.1%                 |
| Sub-village     | exact match             | 0.89   | 90.9%        | 67.2%       | 93.0%          | 78.0%       | 2.1%                              | 10.8%                |

Abbreviations: HDSS = health and demographic surveillance surveys;  $n_M$  = number of matches; m-prob = match probability; TCL = ten-cell leader; HH = household member

Notes: TCL = an individual for a group of ten households; % collected = proportion of matched records with completed information; % agreement = proportion of matched records with agreeing information

Supplemental Figure 1: Log frequency of match scores calculated for all pairwise comparisons using full algorithm, by true match status

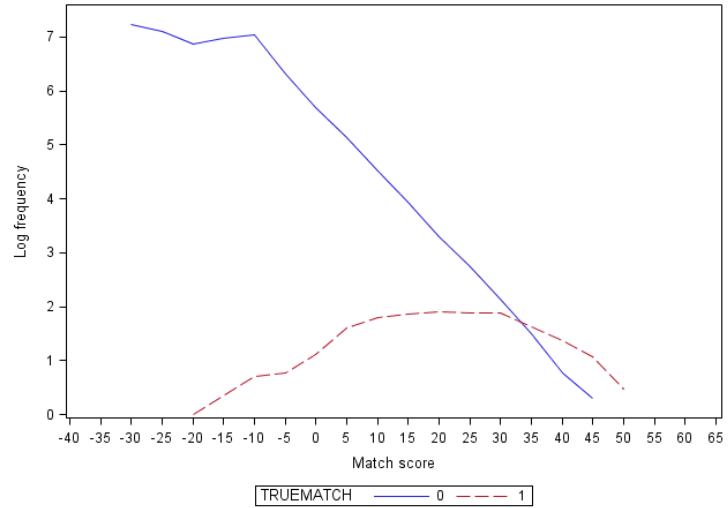

Supplemental Figure 2: Log frequency of match scores calculated for all pairwise comparisons using limited algorithm, by true match status

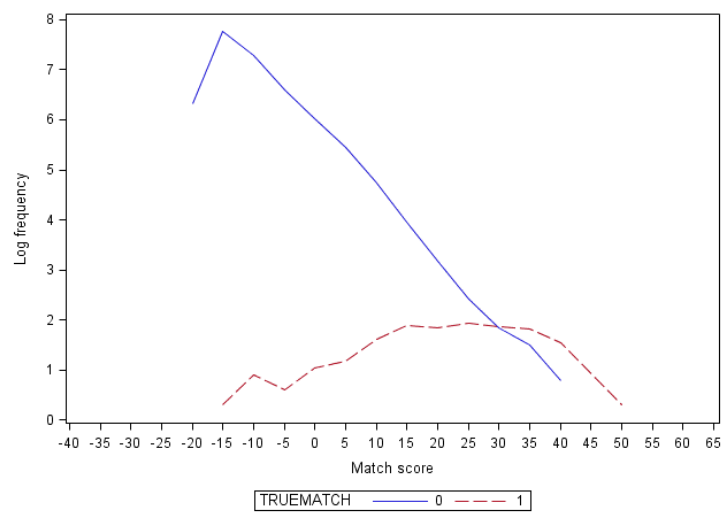

Supplemental Figure 3: Sensitivity (Se) and positive predictive value (PPV) of automated retrospective record linkage at various match score percentile thresholds, full (F) vs. limited (L) algorithm

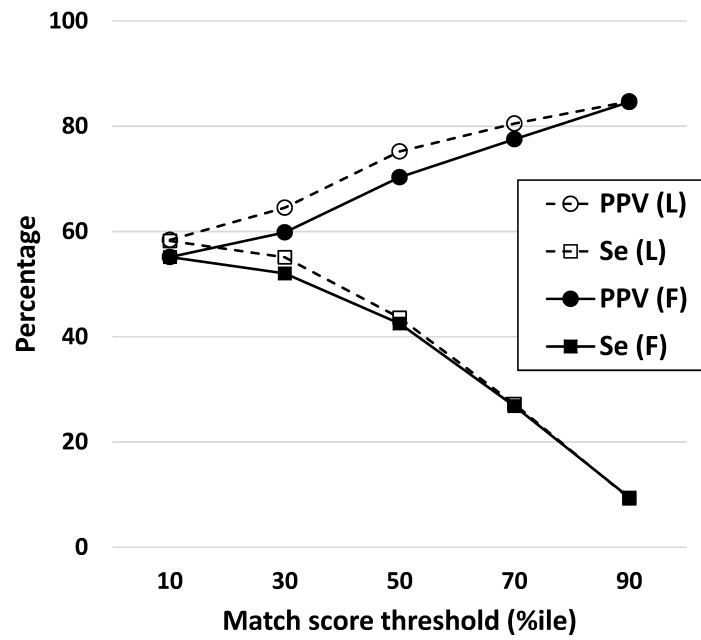

Supplemental Table 2: Distribution of individual characteristics in the dataset matched using point-of-contact interactive record linkage (PIRL) compared with those matched using a purely automated probabilistic approach using a full and limited algorithm, by match score threshold

| Characteristic                                     | PIRL match<br>n (%) | Automated: full algorithm |          |                  |          |                  |          | Automated: limited algorithm |          |                  |          |                  |          |
|----------------------------------------------------|---------------------|---------------------------|----------|------------------|----------|------------------|----------|------------------------------|----------|------------------|----------|------------------|----------|
|                                                    |                     | Threshold=10%ile          |          | Threshold=50%ile |          | Threshold=90%ile |          | Threshold=10%ile             |          | Threshold=50%ile |          | Threshold=90%ile |          |
|                                                    |                     | n (%)                     | p-value* | n (%)            | p-value* | n (%)            | p-value* | n (%)                        | p-value* | n (%)            | p-value* | n (%)            | p-value* |
| Total matched (PPV)                                | 2,612               | 2,612 (55.1)              |          | 1,579 (70.3)     |          | 292 (84.6)       |          | 2602 (58.4)                  |          | 1,514 (75.2)     |          | 288 (84.7)       |          |
| Sex                                                |                     |                           |          |                  |          |                  |          |                              |          |                  |          |                  |          |
| <i>Female</i>                                      | 2,061 (78.9)        | 2,036 (78.0)              | 0.4004   | 1,185 (75.1)     | 0.0038   | 213 (73.0)       | 0.0191   | 2,059 (79.1)                 | 0.8409   | 1,158 (76.5)     | 0.0706   | 209 (72.6)       | 0.0133   |
| <i>Male</i>                                        | 551 (21.1)          | 576 (22.1)                |          | 394 (25.0)       |          | 79 (27.1)        |          | 543 (20.9)                   |          | 356 (23.5)       |          | 79 (27.4)        |          |
| Age, in years                                      |                     |                           |          |                  |          |                  |          |                              |          |                  |          |                  |          |
| <5                                                 | 125 (4.8)           | 198 (7.6)                 | <0.0001  | 132 (8.4)        | <0.0001  | 46 (15.8)        | <0.0001  | 198 (7.6)                    | <0.0001  | 122 (8.1)        | 0.0013   | 33 (11.5)        | <0.0001  |
| 5-17                                               | 393 (15.1)          | 464 (17.8)                |          | 239 (15.2)       |          | 35 (12.0)        |          | 453 (17.4)                   |          | 211 (14.0)       |          | 34 (11.8)        |          |
| 18-34                                              | 1,384 (53.0)        | 1,301 (49.9)              |          | 770 (48.8)       |          | 125 (42.8)       |          | 1,325 (51.0)                 |          | 765 (50.6)       |          | 121 (42.0)       |          |
| 35-49                                              | 522 (20.0)          | 433 (16.6)                |          | 301 (19.1)       |          | 68 (23.3)        |          | 437 (16.8)                   |          | 296 (19.6)       |          | 74 (25.7)        |          |
| 50-64                                              | 160 (6.1)           | 162 (6.2)                 |          | 105 (6.7)        |          | 15 (5.1)         |          | 144 (5.5)                    |          | 99 (6.5)         |          | 23 (8.0)         |          |
| 65+                                                | 28 (1.1)            | 52 (2.0)                  |          | 30 (1.9)         |          | 3 (1.0)          |          | 43 (1.7)                     |          | 20 (1.3)         |          | 3 (1.0)          |          |
| Village of residence                               |                     |                           |          |                  |          |                  |          |                              |          |                  |          |                  |          |
| <i>Kisesa</i>                                      | 999 (38.3)          | 982 (37.6)                | 0.9340   | 586 (37.1)       | 0.8100   | 111 (38.0)       | 0.3320   | 981 (37.7)                   | 0.6773   | 531 (35.1)       | 0.3071   | 73 (25.4)        | 0.0002   |
| <i>Kanyama</i>                                     | 521 (20.0)          | 529 (20.3)                |          | 302 (19.1)       |          | 46 (15.8)        |          | 527 (20.3)                   |          | 299 (19.8)       |          | 59 (20.5)        |          |
| <i>Kitumba</i>                                     | 424 (16.2)          | 444 (17.0)                |          | 262 (16.6)       |          | 48 (16.4)        |          | 436 (16.8)                   |          | 254 (16.8)       |          | 49 (17.0)        |          |
| <i>Isangijo</i>                                    | 257 (9.8)           | 258 (9.9)                 |          | 176 (11.2)       |          | 39 (13.4)        |          | 254 (9.8)                    |          | 177 (11.7)       |          | 46 (16.0)        |          |
| <i>Ihayabuyaga</i>                                 | 152 (5.8)           | 138 (5.3)                 |          | 89 (5.6)         |          | 21 (7.2)         |          | 129 (5.0)                    |          | 87 (5.8)         |          | 22 (7.6)         |          |
| <i>Igekemaja</i>                                   | 141 (5.4)           | 150 (5.7)                 |          | 94 (6.0)         |          | 13 (4.5)         |          | 163 (6.3)                    |          | 94 (6.2)         |          | 24 (8.3)         |          |
| <i>Welamasonga</i>                                 | 118 (4.5)           | 111 (4.3)                 |          | 70 (4.4)         |          | 14 (4.8)         |          | 112 (4.3)                    |          | 72 (4.8)         |          | 15 (5.2)         |          |
| Marital status <sup>a</sup>                        |                     |                           |          |                  |          |                  |          |                              |          |                  |          |                  |          |
| <i>Never married</i>                               | 362 (24.0)          | 272 (24.1)                | 0.9997   | 179 (22.5)       | 0.4266   | 33 (22.3)        | 0.6089   | 286 (25.3)                   | 0.8668   | 176 (22.5)       | 0.7093   | 26 (16.5)        | 0.0139   |
| <i>Married once</i>                                | 724 (48.0)          | 540 (47.8)                |          | 403 (50.6)       |          | 72 (48.7)        |          | 536 (47.4)                   |          | 391 (49.9)       |          | 80 (50.6)        |          |
| <i>Remarried</i>                                   | 175 (11.6)          | 132 (11.7)                |          | 99 (12.4)        |          | 22 (14.9)        |          | 124 (11.0)                   |          | 95 (12.1)        |          | 30 (19.0)        |          |
| <i>Separated/Widowed</i>                           | 249 (16.5)          | 187 (16.5)                |          | 116 (14.6)       |          | 21 (14.2)        |          | 185 (16.4)                   |          | 121 (15.5)       |          | 22 (13.9)        |          |
| Pregnant at last HDSS round <sup>b</sup>           |                     |                           |          |                  |          |                  |          |                              |          |                  |          |                  |          |
| <i>No</i>                                          | 1,057 (95.7)        | 758 (95.5)                | 0.8425   | 529 (95.0)       | 0.5292   | 101 (98.1)       | 0.3094   | 769 (95.2)                   | 0.6166   | 531 (95.5)       | 0.8862   | 93 (92.1)        | 0.1310   |
| <i>Yes</i>                                         | 48 (4.3)            | 36 (4.5)                  |          | 28 (5.0)         |          | 2 (1.9)          |          | 39 (4.8)                     |          | 25 (4.5)         |          | 8 (7.9)          |          |
| Enrolled in school at last HDSS round <sup>c</sup> |                     |                           |          |                  |          |                  |          |                              |          |                  |          |                  |          |
| <i>No</i>                                          | 378 (72.0)          | 282 (67.6)                | 0.1454   | 185 (68.3)       | 0.2725   | 25 (52.1)        | 0.0038   | 295 (67.7)                   | 0.1438   | 186 (69.9)       | 0.5422   | 21 (60.0)        | 0.1288   |
| <i>Yes</i>                                         | 147 (28.0)          | 135 (32.4)                |          | 86 (31.7)        |          | 23 (47.9)        |          | 141 (32.3)                   |          | 80 (30.1)        |          | 14 (40.0)        |          |

Abbreviations: HDSS - health and demographic sentinel surveillance

\*Statistical differences tested for significance with chi-square ( $\chi^2$ ) or Fisher's Exact tests

<sup>a</sup>This question was only given to individuals aged 15 years or older

<sup>b</sup>This question was only given to females between 15 and 49 years of age

<sup>c</sup>This question was only given to individuals between 5 and 25 years of age
